# Supplementary material
Source: Springer Nature journal article supplement (https://www.springermedizin.de/resource/supplementary/12960_2003_8_MOESM2_ESM.pdf/9569742)

# Remittances (billion of dollars)

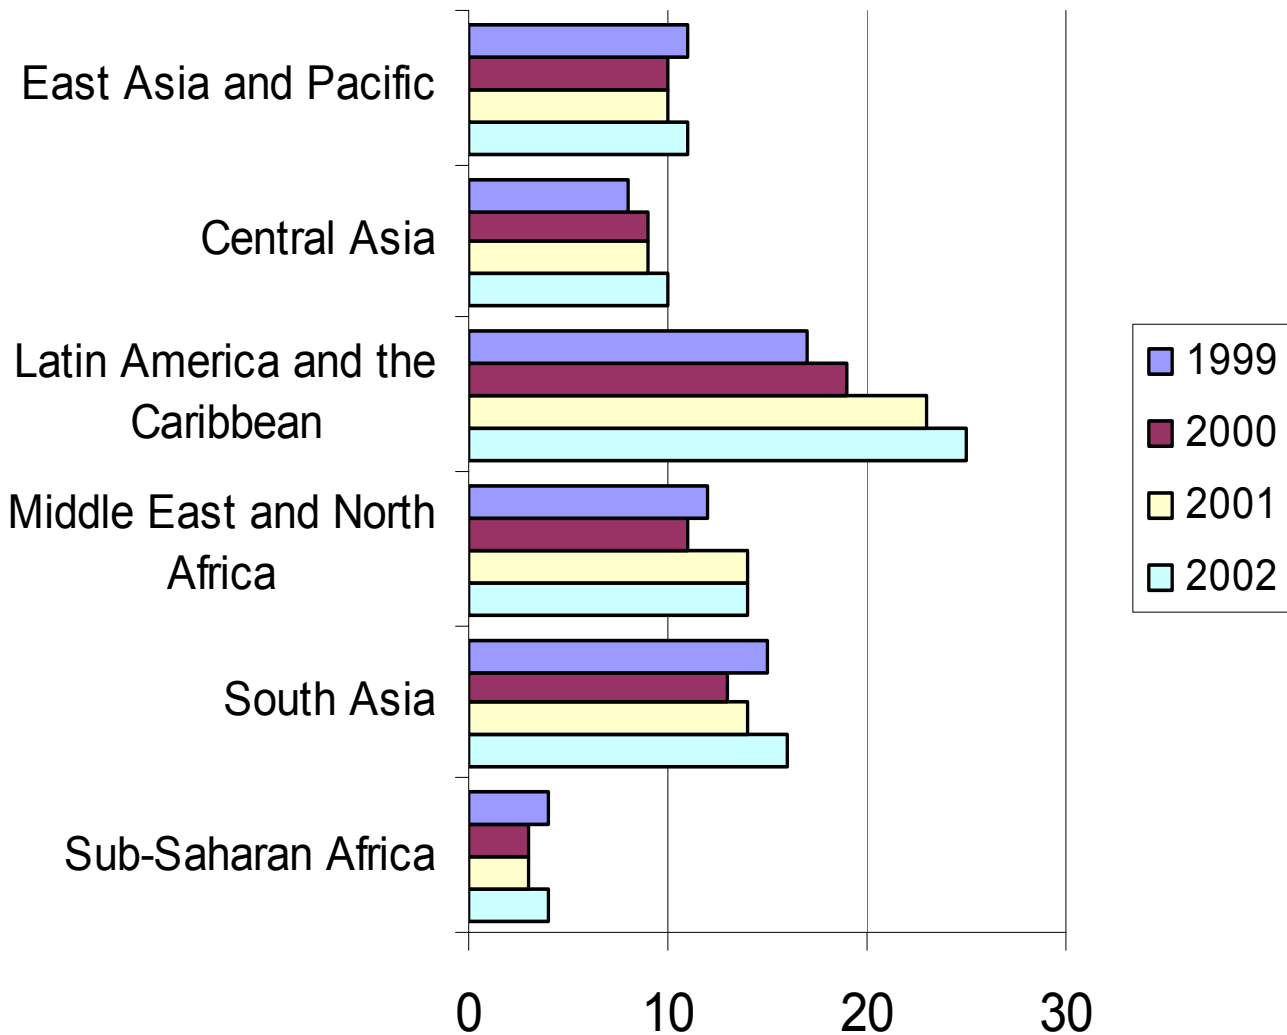

Source: Dilip Ratha: World Bank 2003 (21)

Supplement: MOESM2 [file 9569742]
